# Supplementary material for: Thioredoxin-related transmembrane protein 2 (TMX2) regulates the Ran protein gradient and importin-β-dependent nuclear cargo transport
Source: PubMed Central journal article supplement (PMC6814788; doi:10.1038/s41598-019-51773-x), 2019-10-25
Supplement: 41598_2019_51773_MOESM1_ESM.pdf [file 41598_2019_51773_MOESM1_ESM.pdf]

Thioredoxin-related transmembrane protein 2 (TMX2) regulates the Ran protein gradient  
and importin- $\beta$ -dependent nuclear cargo transport.

Ami Oguro<sup>a,b\*</sup> and Susumu Imaoka<sup>a\*</sup>

<sup>a</sup>Department of Biomedical Chemistry, School of Science and Technology, Kwansai Gakuin University, Sanda, Japan

<sup>b</sup>Program of Biomedical Science, Graduate School of Integrated Sciences for Life, Hiroshima University, Hiroshima, Japan

\*Corresponding author:

Ami Oguro, Ph.D. and Susumu Imaoka, Ph.D.

Department of Biomedical Chemistry, School of Science and Technology, Kwansai Gakuin University,

2-1 Gakuen, Sanda 669-1337, Japan,

Tel/Fax: +81-79-565-7674

E-mail: a.oguro@kwansai.ac.jp

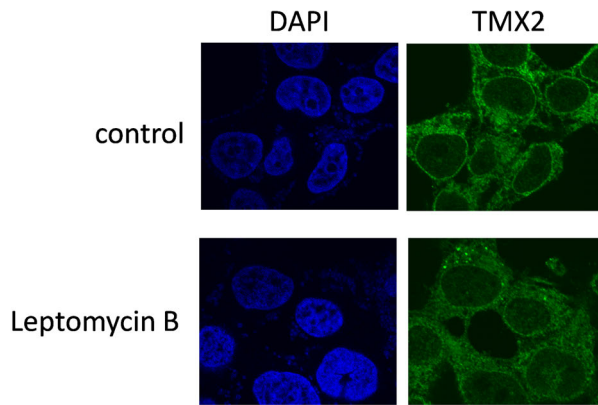

**Supplementary Figure S1**

TMX2 did not accumulate in the nucleus in the presence of Leptomycin B. HEK293 cells were treated with 10 nM Leptomycin B for 6 h, and localization of endogenous TMX2 was observed by immunofluorescence microscopy.

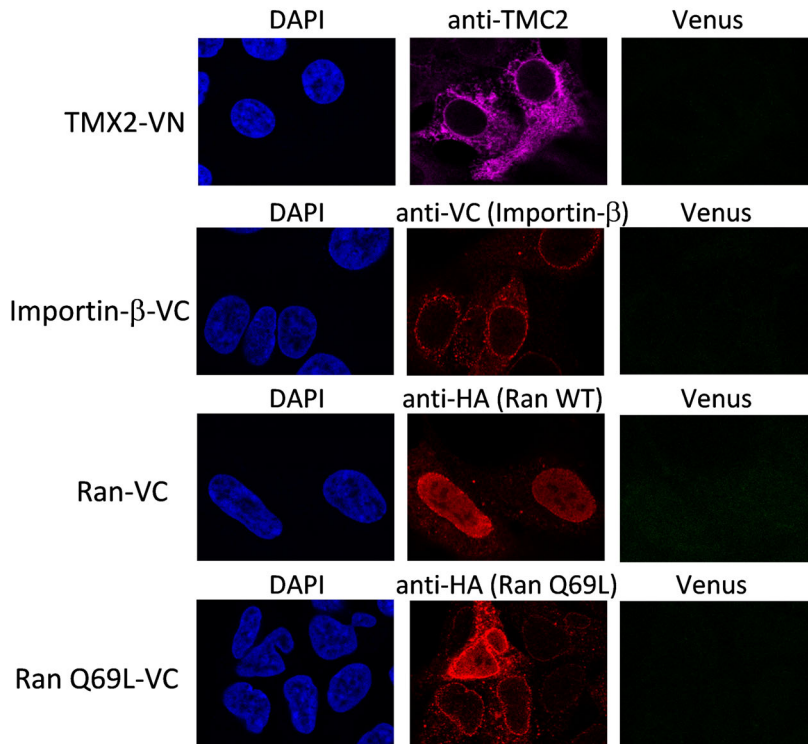

**Supplementary Figure S2**

VN- or VC- fusion proteins do not emit Venus fluorescence by itself. TMX2-VN, importin- $\beta$ -VC, HA-RanWT-VC, or HA-RanQ69L-VC was expressed alone in HEK293 cells, and the overexpression of these proteins were confirmed by anti-TMX2, anti-VC, or anti-HA antibody.



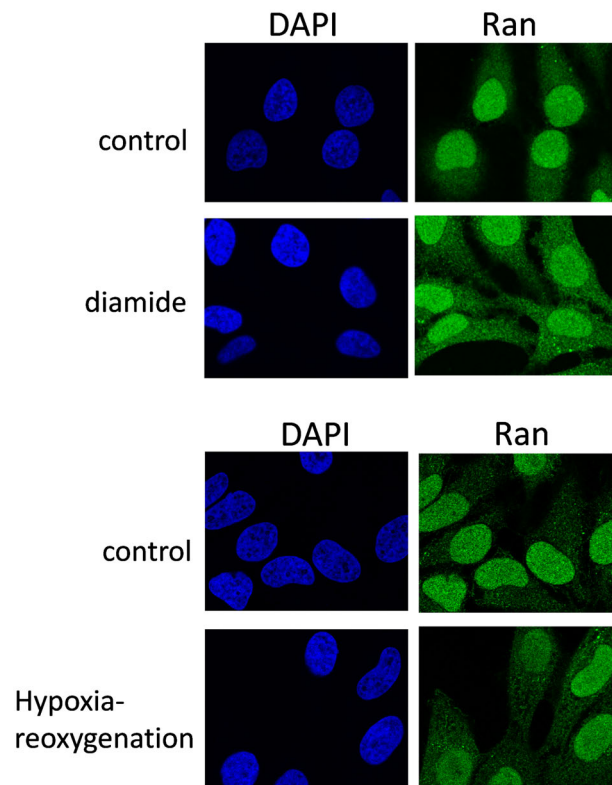

#### Supplementary Figure S5

Diamide, or hypoxia-reoxygenation decreased nuclear Ran levels.

HeLa cells were treated with 200  $\mu$ M diamide for 1 h, or cultured under 1% hypoxia for 4 h followed by reoxygenation with 21% oxygen for 20 min, and localization of Ran was observed by immunofluorescence microscopy.
